# Supplementary figures and images for: NuMY—A qPCR Assay Simultaneously Targeting Human Autosomal, Y-Chromosomal, and Mitochondrial DNA
Source: MDPI journal article supplement (doi:10.3390/genes14081645), 2023-08-18

**A. mtND1**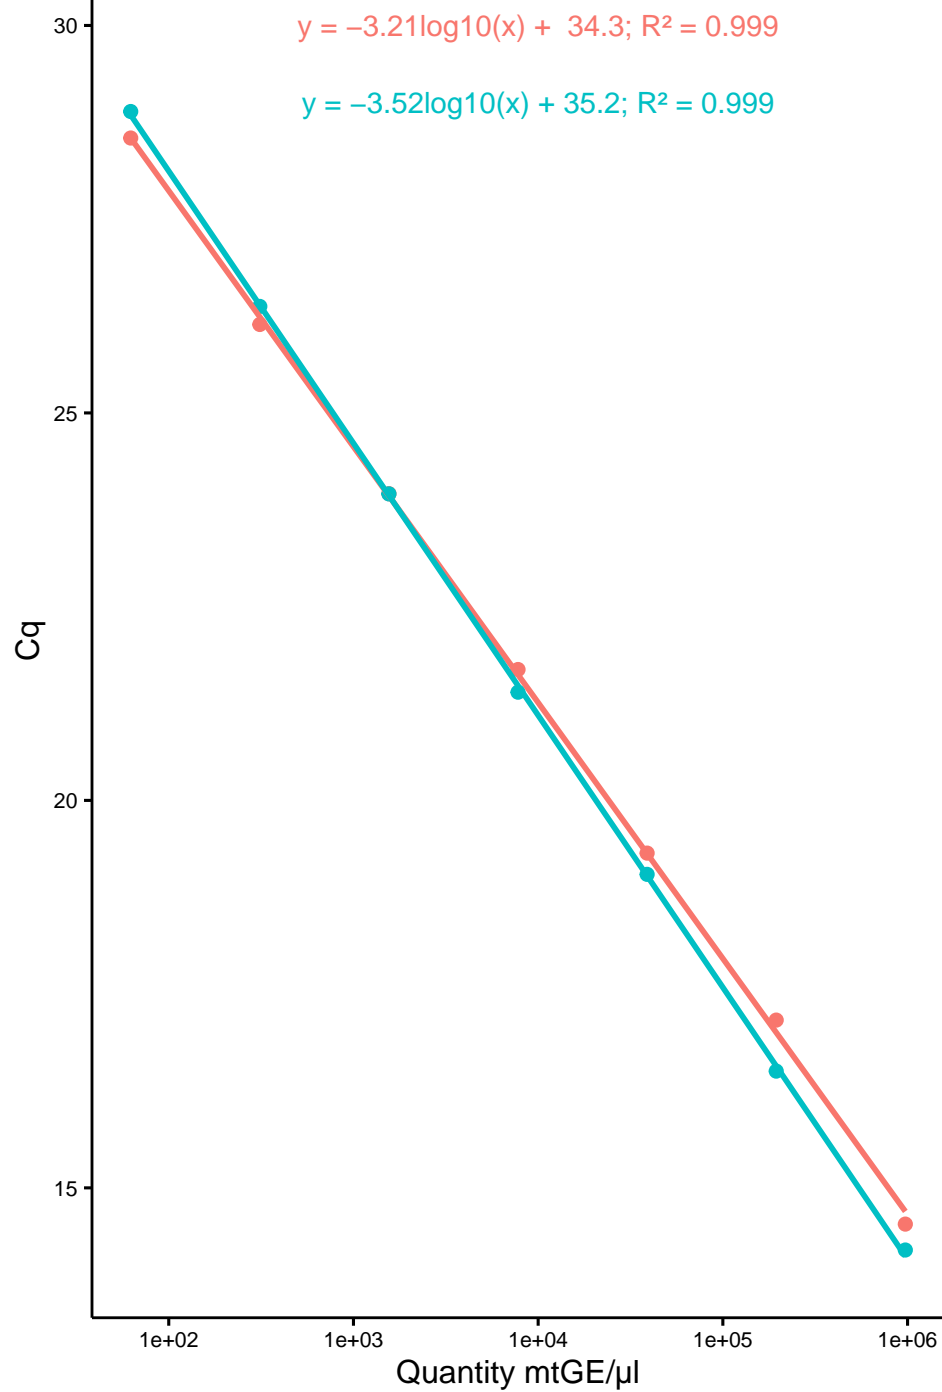**B. YRS**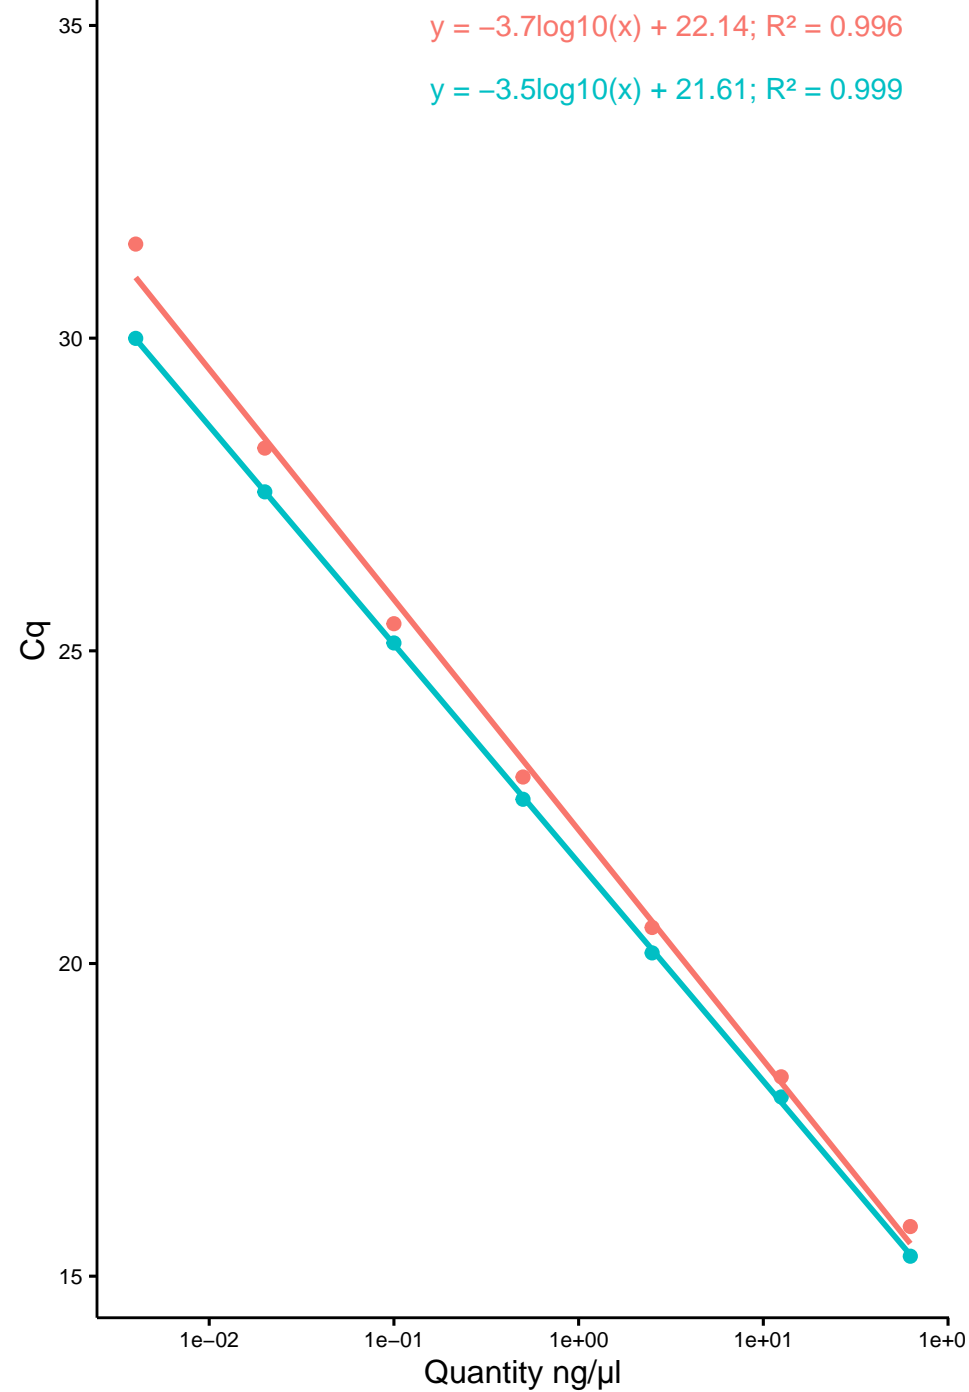**C. nuRNU**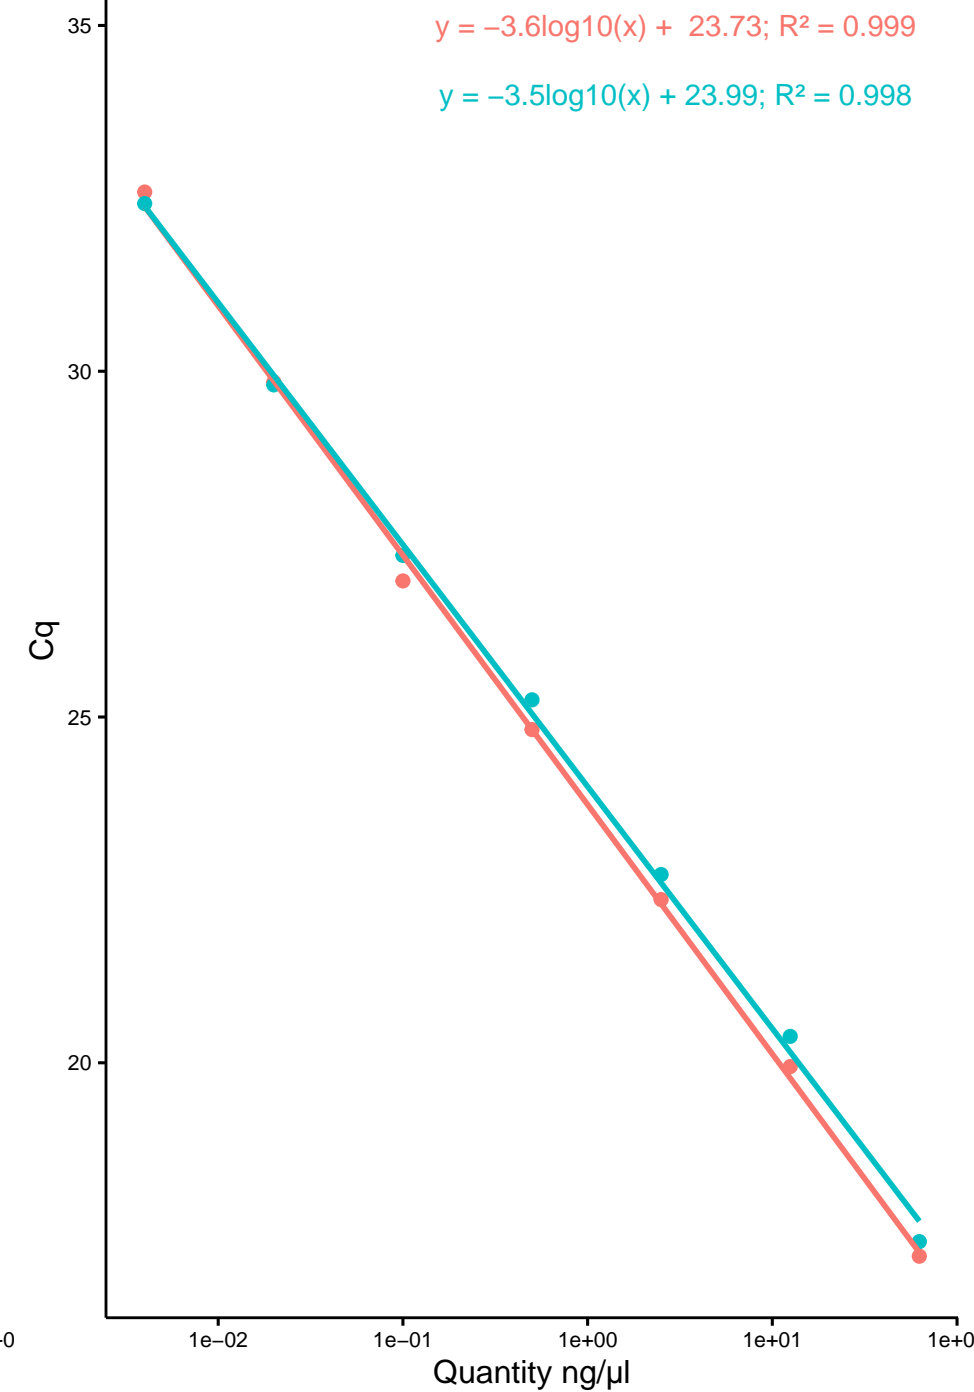

● Multiplex ● Singleplex

Supplement: s1 [file s1]
